# Supplementary material for: The Optimal Range of Serum Uric Acid for Cardiometabolic Diseases: A 5-Year Japanese Cohort Study
Source: MDPI journal article supplement (doi:10.3390/jcm9040942), 2020-03-30
Supplement: s1 [file s1]

**Supplementary Table S1. The sensitivity analyses that excluded 373 (2.9%) subjects with urate-lowering medications: Lower serum urate as a protective factor for the development of hypertension, diabetes, dyslipidemia and chronic kidney disease over 5 years.**

| <b>Maintaining without hypertension</b>      |                       | <b>Crude</b> |             |        | <b>Adjusted*</b> |             |        |
|----------------------------------------------|-----------------------|--------------|-------------|--------|------------------|-------------|--------|
| <b>Women</b>                                 |                       | OR           | 95% CI      | P      | OR               | 95% CI      | P      |
| Serum uric acid                              | per 1 mg/dL decreased | 1.760        | 1.591-1.947 | <0.001 | 1.309            | 1.171-1.462 | <0.001 |
| <hr/>                                        |                       |              |             |        |                  |             |        |
| <b>Men</b>                                   |                       |              |             |        |                  |             |        |
| Serum uric acid                              | per 1 mg/dL decreased | 1.173        | 1.090-1.262 | <0.001 | 1.151            | 1.063-1.246 | <0.001 |
| <hr/>                                        |                       |              |             |        |                  |             |        |
| <b>Maintaining without diabetes mellitus</b> |                       | <b>Crude</b> |             |        | <b>Adjusted†</b> |             |        |
| <b>Women</b>                                 |                       | OR           | 95% CI      | P      | OR               | 95% CI      | P      |
| Serum uric acid                              | per 1 mg/dL decreased | 1.835        | 1.516-2.220 | <0.001 | 1.206            | 0.969-1.502 | 0.093  |
| <hr/>                                        |                       |              |             |        |                  |             |        |
| <b>Men</b>                                   |                       |              |             |        |                  |             |        |
| Serum uric acid                              | per 1 mg/dL decreased | 1.172        | 1.039-1.321 | 0.010  | 1.08             | 0.950-1.227 | 0.24   |
| <hr/>                                        |                       |              |             |        |                  |             |        |
| <b>Maintaining without dyslipidemia</b>      |                       | <b>Crude</b> |             |        | <b>Adjusted‡</b> |             |        |
| <b>Women</b>                                 |                       | OR           | 95% CI      | P      | OR               | 95% CI      | P      |
| Serum uric acid                              | per 1 mg/dL decreased | 1.317        | 1.207-1.436 | <0.001 | 1.127            | 1.027-1.237 | 0.012  |
| <hr/>                                        |                       |              |             |        |                  |             |        |
| <b>Men</b>                                   |                       |              |             |        |                  |             |        |
| Serum uric acid                              | per 1 mg/dL decreased | 1.190        | 1.104-1.282 | <0.001 | 1.146            | 1.058-1.242 | <0.001 |
| <hr/>                                        |                       |              |             |        |                  |             |        |

| Maintaining without chronic kidney disease |                       | Crude |             |        | Adjusted¶ |             |        |
|--------------------------------------------|-----------------------|-------|-------------|--------|-----------|-------------|--------|
|                                            |                       | OR    | 95% CI      | P      | OR        | 95% CI      | P      |
| <b>Women</b>                               |                       |       |             |        |           |             |        |
| Serum uric acid                            | per 1 mg/dL decreased | 1.660 | 1.540-1.791 | <0.001 | 1.422     | 1.309-1.545 | <0.001 |
| <b>Men</b>                                 |                       |       |             |        |           |             |        |
| Serum uric acid                            | per 1 mg/dL decreased | 1.157 | 1.092-1.227 | <0.001 | 1.245     | 1.166-1.329 | <0.001 |

OR, odds ratio; CI, confidence interval; p, probability

\*Data adjusted for age, body mass index, smoking and drinking habits, diabetes mellitus, dyslipidemia, chronic kidney disease, and serum uric acid.

†Data adjusted for age, body mass index, smoking and drinking habits, hypertension, dyslipidemia, chronic kidney disease, and serum uric acid.

‡Data adjusted for age, body mass index, smoking and drinking habits, hypertension, diabetes mellitus, chronic kidney disease, and serum uric acid.

¶Data adjusted for age, body mass index, smoking and drinking habits, hypertension, diabetes mellitus, dyslipidemia, and serum uric acid.
